# Supplementary material for: Rotational excitation of C2H− anion in collision with H2
Source: Royal Society of Chemistry journal article supplement (doi:10.1039/d1ra00519g), 2021-01-01
Supplement: d1ra00519g1.pdf [file d1ra00519g1.pdf]

**Rotational excitation of C<sub>2</sub>H<sup>-</sup> anion in collision with H<sub>2</sub>**  
**Insaf Toumi<sup>a</sup>, Ounaies Yazidi<sup>a,b</sup>, Faouzi Najar<sup>a,c</sup>**

<sup>a</sup>Laboratoire de Spectroscopie Atomique, Moléculaire et Application, Faculté des Sciences, Université Tunis el Manar, Tunis 2092, Tunisia

<sup>b</sup>Institut Préparatoire aux Etudes d'Ingénieurs de Tunis El Manar, Université de Tunis El Manar, Tunis 2092, Tunisia

<sup>c</sup>Institut Préparatoire aux Etudes d'Ingénieurs de Tunis, Université de Tunis, Tunis 1007, Tunisia

**(Supplementary material)**

| R      | I | VI(R)     |
|--------|---|-----------|
| 5.250  | 0 | 1637.7148 |
| 5.500  | 0 | 960.9608  |
| 5.750  | 0 | 510.7201  |
| 6.000  | 0 | 217.2720  |
| 6.250  | 0 | 31.1449   |
| 6.500  | 0 | -82.4633  |
| 6.750  | 0 | -147.7505 |
| 7.000  | 0 | -181.4013 |
| 7.250  | 0 | -194.7615 |
| 7.500  | 0 | -195.4780 |
| 7.750  | 0 | -188.6271 |
| 8.000  | 0 | -177.5847 |
| 8.250  | 0 | -164.5130 |
| 8.500  | 0 | -150.7592 |
| 8.750  | 0 | -137.1591 |
| 9.000  | 0 | -124.1979 |
| 9.250  | 0 | -112.1506 |
| 9.500  | 0 | -101.0735 |
| 9.750  | 0 | -91.0283  |
| 10.000 | 0 | -81.9974  |
| 10.250 | 0 | -73.8962  |
| 10.500 | 0 | -66.6560  |
| 10.750 | 0 | -60.2111  |
| 11.000 | 0 | -54.4750  |
| 11.250 | 0 | -49.3616  |
| 11.500 | 0 | -44.8051  |
| 11.750 | 0 | -40.7450  |
| 12.000 | 0 | -37.1206  |
| 12.250 | 0 | -33.8753  |
| 12.500 | 0 | -30.9681  |
| 12.750 | 0 | -28.3623  |
| 13.000 | 0 | -26.0209  |
| 13.250 | 0 | -23.9097  |
| 13.500 | 0 | -22.0057  |
| 13.750 | 0 | -20.2885  |
| 14.000 | 0 | -18.7379  |
| 14.250 | 0 | -17.3344  |

|        |   |          |
|--------|---|----------|
| 14.500 | 0 | -16.0622 |
| 14.750 | 0 | -14.9065 |
| 15.000 | 0 | -13.8524 |
| 15.250 | 0 | -12.8864 |
| 15.500 | 0 | -12.0013 |
| 15.750 | 0 | -11.1916 |
| 16.000 | 0 | -10.4513 |
| 16.250 | 0 | -9.7750  |
| 16.500 | 0 | -9.1569  |
| 16.750 | 0 | -8.5914  |
| 17.000 | 0 | -8.0726  |
| 17.250 | 0 | -7.5950  |
| 17.500 | 0 | -7.1529  |
| 17.750 | 0 | -6.7412  |
| 18.000 | 0 | -6.3576  |
| 18.250 | 0 | -6.0003  |
| 18.500 | 0 | -5.6677  |
| 18.750 | 0 | -5.3579  |
| 19.000 | 0 | -5.0693  |
| 19.250 | 0 | -4.8002  |
| 19.500 | 0 | -4.5488  |
| 19.750 | 0 | -4.3134  |
| 20.000 | 0 | -4.0923  |
| 20.250 | 0 | -3.8840  |
| 20.500 | 0 | -3.6877  |
| 20.750 | 0 | -3.5030  |
| 21.000 | 0 | -3.3294  |
| 21.250 | 0 | -3.1664  |
| 21.500 | 0 | -3.0134  |
| 21.750 | 0 | -2.8701  |
| 22.000 | 0 | -2.7358  |
| 22.250 | 0 | -2.6100  |
| 22.500 | 0 | -2.4924  |
| 22.750 | 0 | -2.3824  |
| 23.000 | 0 | -2.2794  |
| 23.250 | 0 | -2.1830  |
| 23.500 | 0 | -2.0928  |
| 23.750 | 0 | -2.0081  |
| 24.000 | 0 | -1.9285  |
| 24.250 | 0 | -1.8535  |
| 24.500 | 0 | -1.7825  |
| 24.750 | 0 | -1.7152  |
| 25.000 | 0 | -1.6510  |
| 25.250 | 0 | -1.5894  |
| 25.500 | 0 | -1.5304  |
| 25.750 | 0 | -1.4738  |
| 26.000 | 0 | -1.4195  |
| 26.250 | 0 | -1.3674  |

|        |   |           |
|--------|---|-----------|
| 26.500 | 0 | -1.3175   |
| 26.750 | 0 | -1.2697   |
| 27.000 | 0 | -1.2238   |
| 27.250 | 0 | -1.1798   |
| 27.500 | 0 | -1.1376   |
| 27.750 | 0 | -1.0971   |
| 28.000 | 0 | -1.0582   |
| 28.250 | 0 | -1.0208   |
| 28.500 | 0 | -.9849    |
| 28.750 | 0 | -.9503    |
| 29.000 | 0 | -.9169    |
| 29.250 | 0 | -.8847    |
| 29.500 | 0 | -.8536    |
| 29.750 | 0 | -.8235    |
| 30.000 | 0 | -.7942    |
| 5.250  | 1 | -779.7907 |
| 5.500  | 1 | -498.0121 |
| 5.750  | 1 | -324.0153 |
| 6.000  | 1 | -217.7170 |
| 6.250  | 1 | -153.8710 |
| 6.500  | 1 | -116.0636 |
| 6.750  | 1 | -93.8000  |
| 7.000  | 1 | -80.5296  |
| 7.250  | 1 | -72.2087  |
| 7.500  | 1 | -66.4713  |
| 7.750  | 1 | -61.9422  |
| 8.000  | 1 | -57.9270  |
| 8.250  | 1 | -54.0891  |
| 8.500  | 1 | -50.2858  |
| 8.750  | 1 | -46.5748  |
| 9.000  | 1 | -42.8864  |
| 9.250  | 1 | -39.2867  |
| 9.500  | 1 | -35.8258  |
| 9.750  | 1 | -32.5355  |
| 10.000 | 1 | -29.4950  |
| 10.250 | 1 | -26.6725  |
| 10.500 | 1 | -24.0791  |
| 10.750 | 1 | -21.7359  |
| 11.000 | 1 | -19.6208  |
| 11.250 | 1 | -17.7048  |
| 11.500 | 1 | -15.9725  |
| 11.750 | 1 | -14.4120  |
| 12.000 | 1 | -13.0112  |
| 12.250 | 1 | -11.7579  |
| 12.500 | 1 | -10.6388  |
| 12.750 | 1 | -9.6404   |
| 13.000 | 1 | -8.7490   |
| 13.250 | 1 | -7.9518   |

|        |   |         |
|--------|---|---------|
| 13.500 | 1 | -7.2385 |
| 13.750 | 1 | -6.5995 |
| 14.000 | 1 | -6.0253 |
| 14.250 | 1 | -5.5070 |
| 14.500 | 1 | -5.0387 |
| 14.750 | 1 | -4.6152 |
| 15.000 | 1 | -4.2312 |
| 15.250 | 1 | -3.8820 |
| 15.500 | 1 | -3.5647 |
| 15.750 | 1 | -3.2773 |
| 16.000 | 1 | -3.0172 |
| 16.250 | 1 | -2.7823 |
| 16.500 | 1 | -2.5703 |
| 16.750 | 1 | -2.3788 |
| 17.000 | 1 | -2.2056 |
| 17.250 | 1 | -2.0484 |
| 17.500 | 1 | -1.9049 |
| 17.750 | 1 | -1.7730 |
| 18.000 | 1 | -1.6519 |
| 18.250 | 1 | -1.5406 |
| 18.500 | 1 | -1.4384 |
| 18.750 | 1 | -1.3446 |
| 19.000 | 1 | -1.2583 |
| 19.250 | 1 | -1.1790 |
| 19.500 | 1 | -1.1056 |
| 19.750 | 1 | -1.0376 |
| 20.000 | 1 | -.9741  |
| 20.250 | 1 | -.9145  |
| 20.500 | 1 | -.8585  |
| 20.750 | 1 | -.8060  |
| 21.000 | 1 | -.7568  |
| 21.250 | 1 | -.7108  |
| 21.500 | 1 | -.6679  |
| 21.750 | 1 | -.6278  |
| 22.000 | 1 | -.5905  |
| 22.250 | 1 | -.5558  |
| 22.500 | 1 | -.5236  |
| 22.750 | 1 | -.4937  |
| 23.000 | 1 | -.4659  |
| 23.250 | 1 | -.4402  |
| 23.500 | 1 | -.4163  |
| 23.750 | 1 | -.3942  |
| 24.000 | 1 | -.3736  |
| 24.250 | 1 | -.3545  |
| 24.500 | 1 | -.3367  |
| 24.750 | 1 | -.3200  |
| 25.000 | 1 | -.3043  |
| 25.250 | 1 | -.2895  |

|        |   |           |
|--------|---|-----------|
| 25.500 | 1 | -.2755    |
| 25.750 | 1 | -.2623    |
| 26.000 | 1 | -.2498    |
| 26.250 | 1 | -.2381    |
| 26.500 | 1 | -.2270    |
| 26.750 | 1 | -.2166    |
| 27.000 | 1 | -.2068    |
| 27.250 | 1 | -.1975    |
| 27.500 | 1 | -.1888    |
| 27.750 | 1 | -.1806    |
| 28.000 | 1 | -.1728    |
| 28.250 | 1 | -.1655    |
| 28.500 | 1 | -.1586    |
| 28.750 | 1 | -.1520    |
| 29.000 | 1 | -.1458    |
| 29.250 | 1 | -.1398    |
| 29.500 | 1 | -.1341    |
| 29.750 | 1 | -.1287    |
| 30.000 | 1 | -.1234    |
| 5.250  | 2 | 3949.8037 |
| 5.500  | 2 | 2639.3678 |
| 5.750  | 2 | 1742.6653 |
| 6.000  | 2 | 1134.2800 |
| 6.250  | 2 | 725.7263  |
| 6.500  | 2 | 454.3364  |
| 6.750  | 2 | 276.0965  |
| 7.000  | 2 | 160.5763  |
| 7.250  | 2 | 86.8758   |
| 7.500  | 2 | 40.7660   |
| 7.750  | 2 | 12.6507   |
| 8.000  | 2 | -3.8073   |
| 8.250  | 2 | -12.8947  |
| 8.500  | 2 | -17.4532  |
| 8.750  | 2 | -19.0598  |
| 9.000  | 2 | -19.0478  |
| 9.250  | 2 | -18.1189  |
| 9.500  | 2 | -16.7936  |
| 9.750  | 2 | -15.2402  |
| 10.000 | 2 | -13.6032  |
| 10.250 | 2 | -12.0222  |
| 10.500 | 2 | -10.5656  |
| 10.750 | 2 | -9.2730   |
| 11.000 | 2 | -8.1371   |
| 11.250 | 2 | -7.1399   |
| 11.500 | 2 | -6.2656   |
| 11.750 | 2 | -5.4992   |
| 12.000 | 2 | -4.8255   |
| 12.250 | 2 | -4.2310   |

|        |   |         |
|--------|---|---------|
| 12.500 | 2 | -3.7087 |
| 12.750 | 2 | -3.2527 |
| 13.000 | 2 | -2.8575 |
| 13.250 | 2 | -2.5171 |
| 13.500 | 2 | -2.2238 |
| 13.750 | 2 | -1.9696 |
| 14.000 | 2 | -1.7463 |
| 14.250 | 2 | -1.5471 |
| 14.500 | 2 | -1.3690 |
| 14.750 | 2 | -1.2104 |
| 15.000 | 2 | -1.0694 |
| 15.250 | 2 | -.9446  |
| 15.500 | 2 | -.8345  |
| 15.750 | 2 | -.7379  |
| 16.000 | 2 | -.6537  |
| 16.250 | 2 | -.5805  |
| 16.500 | 2 | -.5171  |
| 16.750 | 2 | -.4624  |
| 17.000 | 2 | -.4151  |
| 17.250 | 2 | -.3739  |
| 17.500 | 2 | -.3377  |
| 17.750 | 2 | -.3054  |
| 18.000 | 2 | -.2765  |
| 18.250 | 2 | -.2508  |
| 18.500 | 2 | -.2280  |
| 18.750 | 2 | -.2078  |
| 19.000 | 2 | -.1900  |
| 19.250 | 2 | -.1742  |
| 19.500 | 2 | -.1602  |
| 19.750 | 2 | -.1478  |
| 20.000 | 2 | -.1366  |
| 20.250 | 2 | -.1264  |
| 20.500 | 2 | -.1172  |
| 20.750 | 2 | -.1088  |
| 21.000 | 2 | -.1012  |
| 21.250 | 2 | -.0944  |
| 21.500 | 2 | -.0884  |
| 21.750 | 2 | -.0830  |
| 22.000 | 2 | -.0782  |
| 22.250 | 2 | -.0740  |
| 22.500 | 2 | -.0703  |
| 22.750 | 2 | -.0670  |
| 23.000 | 2 | -.0642  |
| 23.250 | 2 | -.0617  |
| 23.500 | 2 | -.0596  |
| 23.750 | 2 | -.0577  |
| 24.000 | 2 | -.0560  |
| 24.250 | 2 | -.0544  |

|        |   |            |
|--------|---|------------|
| 24.500 | 2 | -.0530     |
| 24.750 | 2 | -.0516     |
| 25.000 | 2 | -.0502     |
| 25.250 | 2 | -.0488     |
| 25.500 | 2 | -.0473     |
| 25.750 | 2 | -.0458     |
| 26.000 | 2 | -.0442     |
| 26.250 | 2 | -.0427     |
| 26.500 | 2 | -.0411     |
| 26.750 | 2 | -.0394     |
| 27.000 | 2 | -.0378     |
| 27.250 | 2 | -.0362     |
| 27.500 | 2 | -.0345     |
| 27.750 | 2 | -.0329     |
| 28.000 | 2 | -.0312     |
| 28.250 | 2 | -.0296     |
| 28.500 | 2 | -.0280     |
| 28.750 | 2 | -.0264     |
| 29.000 | 2 | -.0248     |
| 29.250 | 2 | -.0233     |
| 29.500 | 2 | -.0218     |
| 29.750 | 2 | -.0204     |
| 30.000 | 2 | -.0190     |
| 5.250  | 3 | -1296.4319 |
| 5.500  | 3 | -810.5033  |
| 5.750  | 3 | -501.4089  |
| 6.000  | 3 | -305.4537  |
| 6.250  | 3 | -182.8931  |
| 6.500  | 3 | -107.5906  |
| 6.750  | 3 | -62.3177   |
| 7.000  | 3 | -35.8000   |
| 7.250  | 3 | -20.8165   |
| 7.500  | 3 | -12.6945   |
| 7.750  | 3 | -8.5713    |
| 8.000  | 3 | -6.6083    |
| 8.250  | 3 | -5.7542    |
| 8.500  | 3 | -5.4122    |
| 8.750  | 3 | -5.3650    |
| 9.000  | 3 | -5.3076    |
| 9.250  | 3 | -5.1685    |
| 9.500  | 3 | -4.9961    |
| 9.750  | 3 | -4.7468    |
| 10.000 | 3 | -4.4091    |
| 10.250 | 3 | -4.0624    |
| 10.500 | 3 | -3.7223    |
| 10.750 | 3 | -3.3845    |
| 11.000 | 3 | -3.0542    |
| 11.250 | 3 | -2.7384    |

|        |   |         |
|--------|---|---------|
| 11.500 | 3 | -2.4424 |
| 11.750 | 3 | -2.1711 |
| 12.000 | 3 | -1.9293 |
| 12.250 | 3 | -1.7198 |
| 12.500 | 3 | -1.5373 |
| 12.750 | 3 | -1.3743 |
| 13.000 | 3 | -1.2235 |
| 13.250 | 3 | -1.0795 |
| 13.500 | 3 | -.9445  |
| 13.750 | 3 | -.8227  |
| 14.000 | 3 | -.7184  |
| 14.250 | 3 | -.6343  |
| 14.500 | 3 | -.5678  |
| 14.750 | 3 | -.5146  |
| 15.000 | 3 | -.4706  |
| 15.250 | 3 | -.4323  |
| 15.500 | 3 | -.3985  |
| 15.750 | 3 | -.3688  |
| 16.000 | 3 | -.3427  |
| 16.250 | 3 | -.3197  |
| 16.500 | 3 | -.2992  |
| 16.750 | 3 | -.2808  |
| 17.000 | 3 | -.2640  |
| 17.250 | 3 | -.2482  |
| 17.500 | 3 | -.2331  |
| 17.750 | 3 | -.2182  |
| 18.000 | 3 | -.2034  |
| 18.250 | 3 | -.1889  |
| 18.500 | 3 | -.1747  |
| 18.750 | 3 | -.1609  |
| 19.000 | 3 | -.1475  |
| 19.250 | 3 | -.1348  |
| 19.500 | 3 | -.1226  |
| 19.750 | 3 | -.1112  |
| 20.000 | 3 | -.1005  |
| 20.250 | 3 | -.0907  |
| 20.500 | 3 | -.0817  |
| 20.750 | 3 | -.0735  |
| 21.000 | 3 | -.0660  |
| 21.250 | 3 | -.0592  |
| 21.500 | 3 | -.0531  |
| 21.750 | 3 | -.0476  |
| 22.000 | 3 | -.0427  |
| 22.250 | 3 | -.0383  |
| 22.500 | 3 | -.0344  |
| 22.750 | 3 | -.0310  |
| 23.000 | 3 | -.0279  |
| 23.250 | 3 | -.0253  |



|        |   |           |
|--------|---|-----------|
| 23.500 | 3 | -.0230    |
| 23.750 | 3 | -.0211    |
| 24.000 | 3 | -.0193    |
| 24.250 | 3 | -.0178    |
| 24.500 | 3 | -.0165    |
| 24.750 | 3 | -.0154    |
| 25.000 | 3 | -.0143    |
| 25.250 | 3 | -.0133    |
| 25.500 | 3 | -.0124    |
| 25.750 | 3 | -.0115    |
| 26.000 | 3 | -.0107    |
| 26.250 | 3 | -.0099    |
| 26.500 | 3 | -.0092    |
| 26.750 | 3 | -.0085    |
| 27.000 | 3 | -.0079    |
| 27.250 | 3 | -.0073    |
| 27.500 | 3 | -.0068    |
| 27.750 | 3 | -.0063    |
| 28.000 | 3 | -.0059    |
| 28.250 | 3 | -.0054    |
| 28.500 | 3 | -.0050    |
| 28.750 | 3 | -.0047    |
| 29.000 | 3 | -.0043    |
| 29.250 | 3 | -.0040    |
| 29.500 | 3 | -.0037    |
| 29.750 | 3 | -.0034    |
| 30.000 | 3 | -.0032    |
| 5.250  | 4 | 2251.6612 |
| 5.500  | 4 | 1487.3122 |
| 5.750  | 4 | 979.0631  |
| 6.000  | 4 | 640.5275  |
| 6.250  | 4 | 416.0887  |
| 6.500  | 4 | 268.0061  |
| 6.750  | 4 | 170.9411  |
| 7.000  | 4 | 107.7834  |
| 7.250  | 4 | 67.0534   |
| 7.500  | 4 | 41.0515   |
| 7.750  | 4 | 24.6192   |
| 8.000  | 4 | 14.3100   |
| 8.250  | 4 | 7.9871    |
| 8.500  | 4 | 4.0940    |
| 8.750  | 4 | 1.8745    |
| 9.000  | 4 | .5262     |
| 9.250  | 4 | -.1919    |
| 9.500  | 4 | -.4752    |
| 9.750  | 4 | -.6565    |
| 10.000 | 4 | -.6727    |
| 10.250 | 4 | -.6336    |

|        |   |        |
|--------|---|--------|
| 10.500 | 4 | -.5692 |
| 10.750 | 4 | -.4756 |
| 11.000 | 4 | -.3808 |
| 11.250 | 4 | -.3132 |
| 11.500 | 4 | -.2699 |
| 11.750 | 4 | -.2405 |
| 12.000 | 4 | -.2143 |
| 12.250 | 4 | -.1833 |
| 12.500 | 4 | -.1496 |
| 12.750 | 4 | -.1178 |
| 13.000 | 4 | -.0925 |
| 13.250 | 4 | -.0771 |
| 13.500 | 4 | -.0702 |
| 13.750 | 4 | -.0694 |
| 14.000 | 4 | -.0721 |
| 14.250 | 4 | -.0759 |
| 14.500 | 4 | -.0796 |
| 14.750 | 4 | -.0822 |
| 15.000 | 4 | -.0824 |
| 15.250 | 4 | -.0796 |
| 15.500 | 4 | -.0741 |
| 15.750 | 4 | -.0663 |
| 16.000 | 4 | -.0568 |
| 16.250 | 4 | -.0461 |
| 16.500 | 4 | -.0348 |
| 16.750 | 4 | -.0235 |
| 17.000 | 4 | -.0127 |
| 17.250 | 4 | -.0029 |
| 17.500 | 4 | .0053  |
| 17.750 | 4 | .0115  |
| 18.000 | 4 | .0158  |
| 18.250 | 4 | .0185  |
| 18.500 | 4 | .0198  |
| 18.750 | 4 | .0198  |
| 19.000 | 4 | .0190  |
| 19.250 | 4 | .0174  |
| 19.500 | 4 | .0153  |
| 19.750 | 4 | .0130  |
| 20.000 | 4 | .0107  |
| 20.250 | 4 | .0086  |
| 20.500 | 4 | .0067  |
| 20.750 | 4 | .0049  |
| 21.000 | 4 | .0034  |
| 21.250 | 4 | .0021  |
| 21.500 | 4 | .0009  |
| 21.750 | 4 | -.0001 |
| 22.000 | 4 | -.0009 |
| 22.250 | 4 | -.0016 |

|        |   |            |
|--------|---|------------|
| 22.500 | 4 | -.0022     |
| 22.750 | 4 | -.0026     |
| 23.000 | 4 | -.0030     |
| 23.250 | 4 | -.0032     |
| 23.500 | 4 | -.0034     |
| 23.750 | 4 | -.0035     |
| 24.000 | 4 | -.0035     |
| 24.250 | 4 | -.0035     |
| 24.500 | 4 | -.0034     |
| 24.750 | 4 | -.0034     |
| 25.000 | 4 | -.0032     |
| 25.250 | 4 | -.0031     |
| 25.500 | 4 | -.0030     |
| 25.750 | 4 | -.0028     |
| 26.000 | 4 | -.0027     |
| 26.250 | 4 | -.0025     |
| 26.500 | 4 | -.0024     |
| 26.750 | 4 | -.0022     |
| 27.000 | 4 | -.0021     |
| 27.250 | 4 | -.0019     |
| 27.500 | 4 | -.0017     |
| 27.750 | 4 | -.0015     |
| 28.000 | 4 | -.0014     |
| 28.250 | 4 | -.0012     |
| 28.500 | 4 | -.0010     |
| 28.750 | 4 | -.0008     |
| 29.000 | 4 | -.0006     |
| 29.250 | 4 | -.0005     |
| 29.500 | 4 | -.0003     |
| 29.750 | 4 | -.0001     |
| 30.000 | 4 | .0001      |
| 5.250  | 5 | -1034.5417 |
| 5.500  | 5 | -663.5585  |
| 5.750  | 5 | -427.1985  |
| 6.000  | 5 | -273.9745  |
| 6.250  | 5 | -174.6811  |
| 6.500  | 5 | -110.4919  |
| 6.750  | 5 | -69.1500   |
| 7.000  | 5 | -42.7718   |
| 7.250  | 5 | -26.1563   |
| 7.500  | 5 | -15.7528   |
| 7.750  | 5 | -9.3828    |
| 8.000  | 5 | -5.5109    |
| 8.250  | 5 | -3.2281    |
| 8.500  | 5 | -1.7367    |
| 8.750  | 5 | -1.0432    |
| 9.000  | 5 | -.5780     |
| 9.250  | 5 | -.3488     |

|        |   |        |
|--------|---|--------|
| 9.500  | 5 | -.1556 |
| 9.750  | 5 | -.1563 |
| 10.000 | 5 | -.1034 |
| 10.250 | 5 | -.0971 |
| 10.500 | 5 | -.1331 |
| 10.750 | 5 | -.1559 |
| 11.000 | 5 | -.1580 |
| 11.250 | 5 | -.1442 |
| 11.500 | 5 | -.1199 |
| 11.750 | 5 | -.0910 |
| 12.000 | 5 | -.0631 |
| 12.250 | 5 | -.0411 |
| 12.500 | 5 | -.0253 |
| 12.750 | 5 | -.0153 |
| 13.000 | 5 | -.0105 |
| 13.250 | 5 | -.0100 |
| 13.500 | 5 | -.0109 |
| 13.750 | 5 | -.0102 |
| 14.000 | 5 | -.0046 |
| 14.250 | 5 | .0081  |
| 14.500 | 5 | .0256  |
| 14.750 | 5 | .0448  |
| 15.000 | 5 | .0625  |
| 15.250 | 5 | .0762  |
| 15.500 | 5 | .0858  |
| 15.750 | 5 | .0916  |
| 16.000 | 5 | .0943  |
| 16.250 | 5 | .0942  |
| 16.500 | 5 | .0920  |
| 16.750 | 5 | .0881  |
| 17.000 | 5 | .0829  |
| 17.250 | 5 | .0771  |
| 17.500 | 5 | .0710  |
| 17.750 | 5 | .0651  |
| 18.000 | 5 | .0595  |
| 18.250 | 5 | .0542  |
| 18.500 | 5 | .0491  |
| 18.750 | 5 | .0443  |
| 19.000 | 5 | .0399  |
| 19.250 | 5 | .0357  |
| 19.500 | 5 | .0319  |
| 19.750 | 5 | .0283  |
| 20.000 | 5 | .0251  |
| 20.250 | 5 | .0222  |
| 20.500 | 5 | .0195  |
| 20.750 | 5 | .0172  |
| 21.000 | 5 | .0151  |
| 21.250 | 5 | .0133  |

|        |   |          |
|--------|---|----------|
| 21.500 | 5 | .0117    |
| 21.750 | 5 | .0104    |
| 22.000 | 5 | .0092    |
| 22.250 | 5 | .0082    |
| 22.500 | 5 | .0074    |
| 22.750 | 5 | .0067    |
| 23.000 | 5 | .0061    |
| 23.250 | 5 | .0057    |
| 23.500 | 5 | .0054    |
| 23.750 | 5 | .0051    |
| 24.000 | 5 | .0049    |
| 24.250 | 5 | .0047    |
| 24.500 | 5 | .0046    |
| 24.750 | 5 | .0044    |
| 25.000 | 5 | .0043    |
| 25.250 | 5 | .0041    |
| 25.500 | 5 | .0039    |
| 25.750 | 5 | .0037    |
| 26.000 | 5 | .0034    |
| 26.250 | 5 | .0032    |
| 26.500 | 5 | .0029    |
| 26.750 | 5 | .0026    |
| 27.000 | 5 | .0023    |
| 27.250 | 5 | .0020    |
| 27.500 | 5 | .0016    |
| 27.750 | 5 | .0013    |
| 28.000 | 5 | .0009    |
| 28.250 | 5 | .0006    |
| 28.500 | 5 | .0002    |
| 28.750 | 5 | -.0001   |
| 29.000 | 5 | -.0005   |
| 29.250 | 5 | -.0008   |
| 29.500 | 5 | -.0012   |
| 29.750 | 5 | -.0015   |
| 30.000 | 5 | -.0018   |
| 5.250  | 6 | 897.5629 |
| 5.500  | 6 | 567.1025 |
| 5.750  | 6 | 362.4928 |
| 6.000  | 6 | 232.3053 |
| 6.250  | 6 | 148.9237 |
| 6.500  | 6 | 95.3231  |
| 6.750  | 6 | 60.7329  |
| 7.000  | 6 | 38.4798  |
| 7.250  | 6 | 24.1870  |
| 7.500  | 6 | 15.1106  |
| 7.750  | 6 | 9.3120   |
| 8.000  | 6 | 5.6937   |
| 8.250  | 6 | 3.4827   |

|        |   |        |
|--------|---|--------|
| 8.500  | 6 | 1.9272 |
| 8.750  | 6 | 1.1759 |
| 9.000  | 6 | .6747  |
| 9.250  | 6 | .3806  |
| 9.500  | 6 | .1543  |
| 9.750  | 6 | .1257  |
| 10.000 | 6 | .0598  |
| 10.250 | 6 | -.0005 |
| 10.500 | 6 | -.0283 |
| 10.750 | 6 | -.0321 |
| 11.000 | 6 | -.0304 |
| 11.250 | 6 | -.0396 |
| 11.500 | 6 | -.0588 |
| 11.750 | 6 | -.0825 |
| 12.000 | 6 | -.1055 |
| 12.250 | 6 | -.1229 |
| 12.500 | 6 | -.1332 |
| 12.750 | 6 | -.1352 |
| 13.000 | 6 | -.1282 |
| 13.250 | 6 | -.1119 |
| 13.500 | 6 | -.0897 |
| 13.750 | 6 | -.0659 |
| 14.000 | 6 | -.0446 |
| 14.250 | 6 | -.0292 |
| 14.500 | 6 | -.0196 |
| 14.750 | 6 | -.0149 |
| 15.000 | 6 | -.0142 |
| 15.250 | 6 | -.0166 |
| 15.500 | 6 | -.0215 |
| 15.750 | 6 | -.0284 |
| 16.000 | 6 | -.0367 |
| 16.250 | 6 | -.0459 |
| 16.500 | 6 | -.0553 |
| 16.750 | 6 | -.0645 |
| 17.000 | 6 | -.0729 |
| 17.250 | 6 | -.0798 |
| 17.500 | 6 | -.0849 |
| 17.750 | 6 | -.0876 |
| 18.000 | 6 | -.0882 |
| 18.250 | 6 | -.0869 |
| 18.500 | 6 | -.0840 |
| 18.750 | 6 | -.0798 |
| 19.000 | 6 | -.0746 |
| 19.250 | 6 | -.0688 |
| 19.500 | 6 | -.0625 |
| 19.750 | 6 | -.0562 |
| 20.000 | 6 | -.0500 |
| 20.250 | 6 | -.0444 |

|        |   |           |
|--------|---|-----------|
| 20.500 | 6 | -.0392    |
| 20.750 | 6 | -.0345    |
| 21.000 | 6 | -.0302    |
| 21.250 | 6 | -.0263    |
| 21.500 | 6 | -.0228    |
| 21.750 | 6 | -.0197    |
| 22.000 | 6 | -.0170    |
| 22.250 | 6 | -.0145    |
| 22.500 | 6 | -.0124    |
| 22.750 | 6 | -.0105    |
| 23.000 | 6 | -.0089    |
| 23.250 | 6 | -.0075    |
| 23.500 | 6 | -.0063    |
| 23.750 | 6 | -.0052    |
| 24.000 | 6 | -.0044    |
| 24.250 | 6 | -.0037    |
| 24.500 | 6 | -.0030    |
| 24.750 | 6 | -.0025    |
| 25.000 | 6 | -.0020    |
| 25.250 | 6 | -.0016    |
| 25.500 | 6 | -.0012    |
| 25.750 | 6 | -.0008    |
| 26.000 | 6 | -.0005    |
| 26.250 | 6 | -.0002    |
| 26.500 | 6 | .0001     |
| 26.750 | 6 | .0003     |
| 27.000 | 6 | .0005     |
| 27.250 | 6 | .0007     |
| 27.500 | 6 | .0009     |
| 27.750 | 6 | .0010     |
| 28.000 | 6 | .0012     |
| 28.250 | 6 | .0013     |
| 28.500 | 6 | .0014     |
| 28.750 | 6 | .0015     |
| 29.000 | 6 | .0015     |
| 29.250 | 6 | .0016     |
| 29.500 | 6 | .0016     |
| 29.750 | 6 | .0017     |
| 30.000 | 6 | .0017     |
| 5.250  | 7 | -481.1059 |
| 5.500  | 7 | -291.6166 |
| 5.750  | 7 | -181.6207 |
| 6.000  | 7 | -114.2237 |
| 6.250  | 7 | -72.3330  |
| 6.500  | 7 | -45.8880  |
| 6.750  | 7 | -28.9961  |
| 7.000  | 7 | -18.2370  |
| 7.250  | 7 | -11.3893  |

|        |   |         |
|--------|---|---------|
| 7.500  | 7 | -7.0513 |
| 7.750  | 7 | -4.3241 |
| 8.000  | 7 | -2.6190 |
| 8.250  | 7 | -1.6044 |
| 8.500  | 7 | -.8370  |
| 8.750  | 7 | -.5997  |
| 9.000  | 7 | -.3260  |
| 9.250  | 7 | -.2108  |
| 9.500  | 7 | -.2257  |
| 9.750  | 7 | -.0971  |
| 10.000 | 7 | -.1043  |
| 10.250 | 7 | -.0855  |
| 10.500 | 7 | -.0298  |
| 10.750 | 7 | .0056   |
| 11.000 | 7 | .0238   |
| 11.250 | 7 | .0402   |
| 11.500 | 7 | .0566   |
| 11.750 | 7 | .0716   |
| 12.000 | 7 | .0839   |
| 12.250 | 7 | .0923   |
| 12.500 | 7 | .0963   |
| 12.750 | 7 | .0957   |
| 13.000 | 7 | .0902   |
| 13.250 | 7 | .0796   |
| 13.500 | 7 | .0644   |
| 13.750 | 7 | .0450   |
| 14.000 | 7 | .0218   |
| 14.250 | 7 | -.0041  |
| 14.500 | 7 | -.0303  |
| 14.750 | 7 | -.0538  |
| 15.000 | 7 | -.0716  |
| 15.250 | 7 | -.0813  |
| 15.500 | 7 | -.0836  |
| 15.750 | 7 | -.0795  |
| 16.000 | 7 | -.0705  |
| 16.250 | 7 | -.0575  |
| 16.500 | 7 | -.0420  |
| 16.750 | 7 | -.0250  |
| 17.000 | 7 | -.0078  |
| 17.250 | 7 | .0084   |
| 17.500 | 7 | .0224   |
| 17.750 | 7 | .0333   |
| 18.000 | 7 | .0411   |
| 18.250 | 7 | .0462   |
| 18.500 | 7 | .0489   |
| 18.750 | 7 | .0498   |
| 19.000 | 7 | .0491   |
| 19.250 | 7 | .0471   |



|        |   |          |
|--------|---|----------|
| 19.500 | 7 | .0444    |
| 19.750 | 7 | .0412    |
| 20.000 | 7 | .0379    |
| 20.250 | 7 | .0348    |
| 20.500 | 7 | .0320    |
| 20.750 | 7 | .0295    |
| 21.000 | 7 | .0271    |
| 21.250 | 7 | .0250    |
| 21.500 | 7 | .0232    |
| 21.750 | 7 | .0215    |
| 22.000 | 7 | .0200    |
| 22.250 | 7 | .0186    |
| 22.500 | 7 | .0174    |
| 22.750 | 7 | .0164    |
| 23.000 | 7 | .0154    |
| 23.250 | 7 | .0146    |
| 23.500 | 7 | .0138    |
| 23.750 | 7 | .0132    |
| 24.000 | 7 | .0126    |
| 24.250 | 7 | .0120    |
| 24.500 | 7 | .0115    |
| 24.750 | 7 | .0109    |
| 25.000 | 7 | .0104    |
| 25.250 | 7 | .0099    |
| 25.500 | 7 | .0093    |
| 25.750 | 7 | .0088    |
| 26.000 | 7 | .0082    |
| 26.250 | 7 | .0076    |
| 26.500 | 7 | .0071    |
| 26.750 | 7 | .0065    |
| 27.000 | 7 | .0059    |
| 27.250 | 7 | .0053    |
| 27.500 | 7 | .0048    |
| 27.750 | 7 | .0042    |
| 28.000 | 7 | .0036    |
| 28.250 | 7 | .0031    |
| 28.500 | 7 | .0025    |
| 28.750 | 7 | .0020    |
| 29.000 | 7 | .0015    |
| 29.250 | 7 | .0010    |
| 29.500 | 7 | .0005    |
| 29.750 | 7 | .0000    |
| 30.000 | 7 | -.0004   |
| 5.250  | 8 | 346.6572 |
| 5.500  | 8 | 197.3724 |
| 5.750  | 8 | 117.5926 |
| 6.000  | 8 | 71.2361  |
| 6.250  | 8 | 43.8827  |

|        |   |         |
|--------|---|---------|
| 6.500  | 8 | 27.3108 |
| 6.750  | 8 | 17.0492 |
| 7.000  | 8 | 10.6117 |
| 7.250  | 8 | 6.6534  |
| 7.500  | 8 | 4.1150  |
| 7.750  | 8 | 2.5431  |
| 8.000  | 8 | 1.5754  |
| 8.250  | 8 | .9359   |
| 8.500  | 8 | .3689   |
| 8.750  | 8 | .3550   |
| 9.000  | 8 | .2114   |
| 9.250  | 8 | .1481   |
| 9.500  | 8 | .1821   |
| 9.750  | 8 | .1752   |
| 10.000 | 8 | .1258   |
| 10.250 | 8 | .1159   |
| 10.500 | 8 | .1190   |
| 10.750 | 8 | .0910   |
| 11.000 | 8 | .0491   |
| 11.250 | 8 | .0198   |
| 11.500 | 8 | .0055   |
| 11.750 | 8 | .0027   |
| 12.000 | 8 | .0080   |
| 12.250 | 8 | .0179   |
| 12.500 | 8 | .0291   |
| 12.750 | 8 | .0384   |
| 13.000 | 8 | .0426   |
| 13.250 | 8 | .0397   |
| 13.500 | 8 | .0326   |
| 13.750 | 8 | .0253   |
| 14.000 | 8 | .0219   |
| 14.250 | 8 | .0255   |
| 14.500 | 8 | .0343   |
| 14.750 | 8 | .0455   |
| 15.000 | 8 | .0562   |
| 15.250 | 8 | .0641   |
| 15.500 | 8 | .0690   |
| 15.750 | 8 | .0713   |
| 16.000 | 8 | .0715   |
| 16.250 | 8 | .0698   |
| 16.500 | 8 | .0666   |
| 16.750 | 8 | .0624   |
| 17.000 | 8 | .0575   |
| 17.250 | 8 | .0522   |
| 17.500 | 8 | .0471   |
| 17.750 | 8 | .0422   |
| 18.000 | 8 | .0378   |
| 18.250 | 8 | .0338   |

|        |   |           |
|--------|---|-----------|
| 18.500 | 8 | .0301     |
| 18.750 | 8 | .0268     |
| 19.000 | 8 | .0237     |
| 19.250 | 8 | .0209     |
| 19.500 | 8 | .0183     |
| 19.750 | 8 | .0159     |
| 20.000 | 8 | .0137     |
| 20.250 | 8 | .0116     |
| 20.500 | 8 | .0096     |
| 20.750 | 8 | .0078     |
| 21.000 | 8 | .0061     |
| 21.250 | 8 | .0046     |
| 21.500 | 8 | .0031     |
| 21.750 | 8 | .0018     |
| 22.000 | 8 | .0006     |
| 22.250 | 8 | -.0005    |
| 22.500 | 8 | -.0015    |
| 22.750 | 8 | -.0023    |
| 23.000 | 8 | -.0031    |
| 23.250 | 8 | -.0038    |
| 23.500 | 8 | -.0044    |
| 23.750 | 8 | -.0049    |
| 24.000 | 8 | -.0053    |
| 24.250 | 8 | -.0056    |
| 24.500 | 8 | -.0059    |
| 24.750 | 8 | -.0060    |
| 25.000 | 8 | -.0061    |
| 25.250 | 8 | -.0061    |
| 25.500 | 8 | -.0061    |
| 25.750 | 8 | -.0060    |
| 26.000 | 8 | -.0058    |
| 26.250 | 8 | -.0056    |
| 26.500 | 8 | -.0054    |
| 26.750 | 8 | -.0051    |
| 27.000 | 8 | -.0047    |
| 27.250 | 8 | -.0043    |
| 27.500 | 8 | -.0039    |
| 27.750 | 8 | -.0035    |
| 28.000 | 8 | -.0030    |
| 28.250 | 8 | -.0025    |
| 28.500 | 8 | -.0021    |
| 28.750 | 8 | -.0016    |
| 29.000 | 8 | -.0011    |
| 29.250 | 8 | -.0006    |
| 29.500 | 8 | -.0001    |
| 29.750 | 8 | .0004     |
| 30.000 | 8 | .0009     |
| 5.250  | 9 | -217.7613 |

|        |   |           |
|--------|---|-----------|
| 5.500  | 9 | -114.1183 |
| 5.750  | 9 | -64.3094  |
| 6.000  | 9 | -37.1029  |
| 6.250  | 9 | -22.0121  |
| 6.500  | 9 | -13.4215  |
| 6.750  | 9 | -8.2992   |
| 7.000  | 9 | -5.1637   |
| 7.250  | 9 | -3.1938   |
| 7.500  | 9 | -1.9961   |
| 7.750  | 9 | -1.2748   |
| 8.000  | 9 | -.7849    |
| 8.250  | 9 | -.4571    |
| 8.500  | 9 | -.0027    |
| 8.750  | 9 | -.1529    |
| 9.000  | 9 | -.1414    |
| 9.250  | 9 | -.1172    |
| 9.500  | 9 | -.0641    |
| 9.750  | 9 | -.1377    |
| 10.000 | 9 | -.1409    |
| 10.250 | 9 | -.1195    |
| 10.500 | 9 | -.1093    |
| 10.750 | 9 | -.1136    |
| 11.000 | 9 | -.1204    |
| 11.250 | 9 | -.1175    |
| 11.500 | 9 | -.1081    |
| 11.750 | 9 | -.0988    |
| 12.000 | 9 | -.0964    |
| 12.250 | 9 | -.1055    |
| 12.500 | 9 | -.1207    |
| 12.750 | 9 | -.1347    |
| 13.000 | 9 | -.1400    |
| 13.250 | 9 | -.1309    |
| 13.500 | 9 | -.1101    |
| 13.750 | 9 | -.0822    |
| 14.000 | 9 | -.0515    |
| 14.250 | 9 | -.0223    |
| 14.500 | 9 | .0037     |
| 14.750 | 9 | .0249     |
| 15.000 | 9 | .0401     |
| 15.250 | 9 | .0482     |
| 15.500 | 9 | .0498     |
| 15.750 | 9 | .0461     |
| 16.000 | 9 | .0380     |
| 16.250 | 9 | .0267     |
| 16.500 | 9 | .0131     |
| 16.750 | 9 | -.0017    |
| 17.000 | 9 | -.0167    |
| 17.250 | 9 | -.0308    |

|        |   |        |
|--------|---|--------|
| 17.500 | 9 | -.0430 |
| 17.750 | 9 | -.0523 |
| 18.000 | 9 | -.0591 |
| 18.250 | 9 | -.0634 |
| 18.500 | 9 | -.0656 |
| 18.750 | 9 | -.0661 |
| 19.000 | 9 | -.0651 |
| 19.250 | 9 | -.0630 |
| 19.500 | 9 | -.0599 |
| 19.750 | 9 | -.0563 |
| 20.000 | 9 | -.0525 |
| 20.250 | 9 | -.0486 |
| 20.500 | 9 | -.0448 |
| 20.750 | 9 | -.0410 |
| 21.000 | 9 | -.0373 |
| 21.250 | 9 | -.0337 |
| 21.500 | 9 | -.0302 |
| 21.750 | 9 | -.0268 |
| 22.000 | 9 | -.0234 |
| 22.250 | 9 | -.0202 |
| 22.500 | 9 | -.0172 |
| 22.750 | 9 | -.0142 |
| 23.000 | 9 | -.0114 |
| 23.250 | 9 | -.0088 |
| 23.500 | 9 | -.0063 |
| 23.750 | 9 | -.0040 |
| 24.000 | 9 | -.0019 |
| 24.250 | 9 | .0000  |
| 24.500 | 9 | .0017  |
| 24.750 | 9 | .0032  |
| 25.000 | 9 | .0044  |
| 25.250 | 9 | .0055  |
| 25.500 | 9 | .0063  |
| 25.750 | 9 | .0069  |
| 26.000 | 9 | .0073  |
| 26.250 | 9 | .0075  |
| 26.500 | 9 | .0076  |
| 26.750 | 9 | .0075  |
| 27.000 | 9 | .0072  |
| 27.250 | 9 | .0069  |
| 27.500 | 9 | .0064  |
| 27.750 | 9 | .0058  |
| 28.000 | 9 | .0052  |
| 28.250 | 9 | .0044  |
| 28.500 | 9 | .0036  |
| 28.750 | 9 | .0028  |
| 29.000 | 9 | .0019  |
| 29.250 | 9 | .0011  |

|        |    |          |
|--------|----|----------|
| 29.500 | 9  | .0002    |
| 29.750 | 9  | -.0007   |
| 30.000 | 9  | -.0016   |
| 30.250 | 9  | -.0024   |
| 30.500 | 9  | -.0032   |
| 30.750 | 9  | -.0039   |
| 31.000 | 9  | -.0046   |
| 31.250 | 9  | -.0053   |
| 31.500 | 9  | -.0060   |
| 31.750 | 9  | -.0066   |
| 32.000 | 9  | -.0072   |
| 32.250 | 9  | -.0077   |
| 32.500 | 9  | -.0082   |
| 32.750 | 9  | -.0087   |
| 33.000 | 9  | -.0092   |
| 5.250  | 10 | 197.7597 |
| 5.500  | 10 | 91.5781  |
| 5.750  | 10 | 46.9772  |
| 6.000  | 10 | 24.5980  |
| 6.250  | 10 | 13.4385  |
| 6.500  | 10 | 7.6987   |
| 6.750  | 10 | 4.5270   |
| 7.000  | 10 | 2.7657   |
| 7.250  | 10 | 1.7013   |
| 7.500  | 10 | 1.0356   |
| 7.750  | 10 | .6836    |
| 8.000  | 10 | .4106    |
| 8.250  | 10 | .2545    |
| 8.500  | 10 | -.2526   |
| 8.750  | 10 | .1040    |
| 9.000  | 10 | .0554    |
| 9.250  | 10 | .0281    |
| 9.500  | 10 | .0107    |
| 9.750  | 10 | -.0216   |
| 10.000 | 10 | -.0192   |
| 10.250 | 10 | -.0031   |
| 10.500 | 10 | .0142    |
| 10.750 | 10 | .0287    |
| 11.000 | 10 | .0401    |
| 11.250 | 10 | .0491    |
| 11.500 | 10 | .0565    |
| 11.750 | 10 | .0636    |
| 12.000 | 10 | .0712    |
| 12.250 | 10 | .0800    |
| 12.500 | 10 | .0881    |
| 12.750 | 10 | .0929    |
| 13.000 | 10 | .0921    |
| 13.250 | 10 | .0838    |

|        |    |        |
|--------|----|--------|
| 13.500 | 10 | .0689  |
| 13.750 | 10 | .0489  |
| 14.000 | 10 | .0254  |
| 14.250 | 10 | .0001  |
| 14.500 | 10 | -.0249 |
| 14.750 | 10 | -.0471 |
| 15.000 | 10 | -.0640 |
| 15.250 | 10 | -.0739 |
| 15.500 | 10 | -.0772 |
| 15.750 | 10 | -.0749 |
| 16.000 | 10 | -.0681 |
| 16.250 | 10 | -.0577 |
| 16.500 | 10 | -.0449 |
| 16.750 | 10 | -.0307 |
| 17.000 | 10 | -.0161 |
| 17.250 | 10 | -.0022 |
| 17.500 | 10 | .0101  |
| 17.750 | 10 | .0199  |
| 18.000 | 10 | .0272  |
| 18.250 | 10 | .0323  |
| 18.500 | 10 | .0356  |
| 18.750 | 10 | .0371  |
| 19.000 | 10 | .0374  |
| 19.250 | 10 | .0365  |
| 19.500 | 10 | .0348  |
| 19.750 | 10 | .0325  |
| 20.000 | 10 | .0299  |
| 20.250 | 10 | .0273  |
| 20.500 | 10 | .0246  |
| 20.750 | 10 | .0219  |
| 21.000 | 10 | .0193  |
| 21.250 | 10 | .0166  |
| 21.500 | 10 | .0140  |
| 21.750 | 10 | .0114  |
| 22.000 | 10 | .0089  |
| 22.250 | 10 | .0064  |
| 22.500 | 10 | .0041  |
| 22.750 | 10 | .0018  |
| 23.000 | 10 | -.0004 |
| 23.250 | 10 | -.0025 |
| 23.500 | 10 | -.0045 |
| 23.750 | 10 | -.0063 |
| 24.000 | 10 | -.0080 |
| 24.250 | 10 | -.0095 |
| 24.500 | 10 | -.0109 |
| 24.750 | 10 | -.0120 |
| 25.000 | 10 | -.0130 |
| 25.250 | 10 | -.0138 |

|        |    |           |
|--------|----|-----------|
| 25.500 | 10 | -.0144    |
| 25.750 | 10 | -.0148    |
| 26.000 | 10 | -.0150    |
| 26.250 | 10 | -.0151    |
| 26.500 | 10 | -.0151    |
| 26.750 | 10 | -.0149    |
| 27.000 | 10 | -.0146    |
| 27.250 | 10 | -.0141    |
| 27.500 | 10 | -.0136    |
| 27.750 | 10 | -.0130    |
| 28.000 | 10 | -.0124    |
| 28.250 | 10 | -.0116    |
| 28.500 | 10 | -.0108    |
| 28.750 | 10 | -.0100    |
| 29.000 | 10 | -.0092    |
| 29.250 | 10 | -.0083    |
| 29.500 | 10 | -.0074    |
| 29.750 | 10 | -.0066    |
| 30.000 | 10 | -.0058    |
| 5.250  | 11 | -203.2202 |
| 5.500  | 11 | -85.6728  |
| 5.750  | 11 | -40.9156  |
| 6.000  | 11 | -19.5549  |
| 6.250  | 11 | -9.7463   |
| 6.500  | 11 | -5.1627   |
| 6.750  | 11 | -2.8603   |
| 7.000  | 11 | -1.6512   |
| 7.250  | 11 | -1.0504   |
| 7.500  | 11 | -.6390    |
| 7.750  | 11 | -.3516    |
| 8.000  | 11 | -.1833    |
| 8.250  | 11 | -.1405    |
| 8.500  | 11 | .4761     |
| 8.750  | 11 | -.0762    |
| 9.000  | 11 | -.0322    |
| 9.250  | 11 | .0118     |
| 9.500  | 11 | .0672     |
| 9.750  | 11 | .1284     |
| 10.000 | 11 | .1311     |
| 10.250 | 11 | .1176     |
| 10.500 | 11 | .1102     |
| 10.750 | 11 | .1148     |
| 11.000 | 11 | .1178     |
| 11.250 | 11 | .1054     |
| 11.500 | 11 | .0823     |
| 11.750 | 11 | .0577     |
| 12.000 | 11 | .0411     |
| 12.250 | 11 | .0389     |



|        |    |        |
|--------|----|--------|
| 12.500 | 11 | .0470  |
| 12.750 | 11 | .0584  |
| 13.000 | 11 | .0662  |
| 13.250 | 11 | .0650  |
| 13.500 | 11 | .0561  |
| 13.750 | 11 | .0428  |
| 14.000 | 11 | .0279  |
| 14.250 | 11 | .0141  |
| 14.500 | 11 | .0023  |
| 14.750 | 11 | -.0073 |
| 15.000 | 11 | -.0143 |
| 15.250 | 11 | -.0184 |
| 15.500 | 11 | -.0199 |
| 15.750 | 11 | -.0191 |
| 16.000 | 11 | -.0166 |
| 16.250 | 11 | -.0126 |
| 16.500 | 11 | -.0076 |
| 16.750 | 11 | -.0021 |
| 17.000 | 11 | .0037  |
| 17.250 | 11 | .0093  |
| 17.500 | 11 | .0142  |
| 17.750 | 11 | .0182  |
| 18.000 | 11 | .0213  |
| 18.250 | 11 | .0236  |
| 18.500 | 11 | .0252  |
| 18.750 | 11 | .0262  |
| 19.000 | 11 | .0267  |
| 19.250 | 11 | .0268  |
| 19.500 | 11 | .0267  |
| 19.750 | 11 | .0263  |
| 20.000 | 11 | .0258  |
| 20.250 | 11 | .0253  |
| 20.500 | 11 | .0249  |
| 20.750 | 11 | .0244  |
| 21.000 | 11 | .0240  |
| 21.250 | 11 | .0235  |
| 21.500 | 11 | .0231  |
| 21.750 | 11 | .0226  |
| 22.000 | 11 | .0222  |
| 22.250 | 11 | .0217  |
| 22.500 | 11 | .0213  |
| 22.750 | 11 | .0208  |
| 23.000 | 11 | .0204  |
| 23.250 | 11 | .0199  |
| 23.500 | 11 | .0194  |
| 23.750 | 11 | .0189  |
| 24.000 | 11 | .0184  |
| 24.250 | 11 | .0179  |

|        |    |         |
|--------|----|---------|
| 24.500 | 11 | .0173   |
| 24.750 | 11 | .0167   |
| 25.000 | 11 | .0161   |
| 25.250 | 11 | .0155   |
| 25.500 | 11 | .0149   |
| 25.750 | 11 | .0142   |
| 26.000 | 11 | .0135   |
| 26.250 | 11 | .0128   |
| 26.500 | 11 | .0121   |
| 26.750 | 11 | .0114   |
| 27.000 | 11 | .0106   |
| 27.250 | 11 | .0099   |
| 27.500 | 11 | .0091   |
| 27.750 | 11 | .0084   |
| 28.000 | 11 | .0076   |
| 28.250 | 11 | .0069   |
| 28.500 | 11 | .0062   |
| 28.750 | 11 | .0055   |
| 29.000 | 11 | .0047   |
| 29.250 | 11 | .0040   |
| 29.500 | 11 | .0034   |
| 29.750 | 11 | .0027   |
| 30.000 | 11 | .0021   |
| 5.250  | 12 | 99.2122 |
| 5.500  | 12 | 40.6278 |
| 5.750  | 12 | 18.9406 |
| 6.000  | 12 | 8.7644  |
| 6.250  | 12 | 4.1887  |
| 6.500  | 12 | 2.1331  |
| 6.750  | 12 | 1.1538  |
| 7.000  | 12 | .6411   |
| 7.250  | 12 | .4089   |
| 7.500  | 12 | .2443   |
| 7.750  | 12 | .1319   |
| 8.000  | 12 | .0491   |
| 8.250  | 12 | .0543   |
| 8.500  | 12 | -.2667  |
| 8.750  | 12 | .0246   |
| 9.000  | 12 | .0297   |
| 9.250  | 12 | .0078   |
| 9.500  | 12 | -.0181  |
| 9.750  | 12 | -.0426  |
| 10.000 | 12 | -.0547  |
| 10.250 | 12 | -.0747  |
| 10.500 | 12 | -.0939  |
| 10.750 | 12 | -.0986  |
| 11.000 | 12 | -.0909  |
| 11.250 | 12 | -.0769  |

|        |    |        |
|--------|----|--------|
| 11.500 | 12 | -.0612 |
| 11.750 | 12 | -.0481 |
| 12.000 | 12 | -.0417 |
| 12.250 | 12 | -.0450 |
| 12.500 | 12 | -.0541 |
| 12.750 | 12 | -.0638 |
| 13.000 | 12 | -.0690 |
| 13.250 | 12 | -.0655 |
| 13.500 | 12 | -.0550 |
| 13.750 | 12 | -.0400 |
| 14.000 | 12 | -.0232 |
| 14.250 | 12 | -.0072 |
| 14.500 | 12 | .0071  |
| 14.750 | 12 | .0191  |
| 15.000 | 12 | .0280  |
| 15.250 | 12 | .0333  |
| 15.500 | 12 | .0353  |
| 15.750 | 12 | .0345  |
| 16.000 | 12 | .0315  |
| 16.250 | 12 | .0266  |
| 16.500 | 12 | .0205  |
| 16.750 | 12 | .0136  |
| 17.000 | 12 | .0064  |
| 17.250 | 12 | -.0006 |
| 17.500 | 12 | -.0069 |
| 17.750 | 12 | -.0121 |
| 18.000 | 12 | -.0162 |
| 18.250 | 12 | -.0193 |
| 18.500 | 12 | -.0216 |
| 18.750 | 12 | -.0231 |
| 19.000 | 12 | -.0241 |
| 19.250 | 12 | -.0244 |
| 19.500 | 12 | -.0244 |
| 19.750 | 12 | -.0241 |
| 20.000 | 12 | -.0237 |
| 20.250 | 12 | -.0231 |
| 20.500 | 12 | -.0225 |
| 20.750 | 12 | -.0219 |
| 21.000 | 12 | -.0212 |
| 21.250 | 12 | -.0204 |
| 21.500 | 12 | -.0196 |
| 21.750 | 12 | -.0188 |
| 22.000 | 12 | -.0180 |
| 22.250 | 12 | -.0171 |
| 22.500 | 12 | -.0163 |
| 22.750 | 12 | -.0154 |
| 23.000 | 12 | -.0145 |
| 23.250 | 12 | -.0136 |

|        |    |        |
|--------|----|--------|
| 23.500 | 12 | -.0127 |
| 23.750 | 12 | -.0118 |
| 24.000 | 12 | -.0110 |
| 24.250 | 12 | -.0101 |
| 24.500 | 12 | -.0093 |
| 24.750 | 12 | -.0085 |
| 25.000 | 12 | -.0077 |
| 25.250 | 12 | -.0070 |
| 25.500 | 12 | -.0063 |
| 25.750 | 12 | -.0057 |
| 26.000 | 12 | -.0051 |
| 26.250 | 12 | -.0045 |
| 26.500 | 12 | -.0039 |
| 26.750 | 12 | -.0034 |
| 27.000 | 12 | -.0029 |
| 27.250 | 12 | -.0025 |
| 27.500 | 12 | -.0020 |
| 27.750 | 12 | -.0016 |
| 28.000 | 12 | -.0012 |
| 28.250 | 12 | -.0008 |
| 28.500 | 12 | -.0005 |
| 28.750 | 12 | -.0001 |
| 29.000 | 12 | .0002  |
| 29.250 | 12 | .0005  |
| 29.500 | 12 | .0008  |
| 29.750 | 12 | .0011  |
| 30.000 | 12 | .0013  |
